# Supplementary material for: Organic acids from root exudates of banana help root colonization of PGPR strain Bacillus amyloliquefaciens NJN-6
Source: Springer Nature journal article supplement (doi:10.1038/srep13438), 2015-08-24
Supplement: 41598_2015_BFsrep13438_MOESM1_ESM.pdf [file 41598_2015_BFsrep13438_MOESM1_ESM.pdf]

Organic acids from root exudates of banana help root colonization of PGPR  
strain *Bacillus amyloliquefaciens* NJN-6

Jun Yuan<sup>a1,2</sup>, Nan Zhang<sup>a1</sup>, Qiwei Huang<sup>1</sup>, Waseem Raza<sup>1</sup>, Rong Li<sup>1</sup>, Jorge M. Vivanco<sup>2</sup>,  
Qirong Shen

**Table S1** Primers used for quantitative reverse transcription PCR (qRT-PCR) in this study.

| Gene        | Name          | Sequence               | Product size | Reference |
|-------------|---------------|------------------------|--------------|-----------|
| <i>recA</i> | <i>recA-F</i> | AAAAAACAAGTCGCTCCTCCG  | 109 bp       | 31        |
|             | <i>recA-R</i> | CGATATCCAGTTCAGTTCCAAG |              |           |
| <i>epsD</i> | <i>epsD-F</i> | CAGGACAACGGCTACGACATGA | 389 bp       | 31        |
|             | <i>epsD-R</i> | AGCGGGATAAACGAGAATAAAT |              |           |
| <i>yqxM</i> | <i>yqxM-F</i> | ATTTTACGGCTTTCGTTTCATT | 269 bp       | 31        |
|             | <i>yqxM-R</i> | GTCCGCTCTTTCCCTTATTCT  |              |           |
